# Supplementary material for: MicroRNA-155-5p Overexpression in Peripheral Blood Mononuclear Cells of Chronic Lymphocytic Leukemia Patients Is a Novel, Independent Molecular Biomarker of Poor Prognosis
Source: Hindawi journal article supplement (doi:10.1155/2017/2046545), 2017-01-01
Supplement: f1 [file 2046545.f1.pdf]

## Supplementary Materials and Methods

*Cell immunophenotyping.* Immunophenotyping of B-CLL cells was performed with a routine panel of evaluated monoclonal antibodies such as anti-CD3, -CD5, -CD10, -CD11c, -CD19, -CD20, -CD23, -FMC7, -Igκ, and -Igλ (Immunotech, Prague, Czech Republic), conjugated with fluorescein isothiocyanate (FITC), R-phycoerythrin (R-PE), or cyanine-5 (Cy5), with flow cytometry in a Coulter® Epics® XL-MCL™ Flow Cytometer (Beckman Coulter Inc., Miami, FL, USA). B-CLL diagnosis was established by detecting the leukemic CD5<sup>+</sup>/CD19<sup>+</sup>/CD23<sup>+</sup> cell clone. A monoclonal anti-CD38 antibody was used for CD38 expression analysis.

*Early apoptosis detection.* For whole blood lysis, 2 mL of whole blood were mixed with ammonium chloride in a proportion 1:7. After centrifugation, the supernatant was discarded and the remaining cell pellet was washed three times with PBS (pH 7.2, 25°C). Cells were co-stained with Annexin V-FITC (green fluorescence signal) and propidium iodide (PI), thus allowing the simultaneous discrimination of leukemic cells into intact (FITC<sup>-</sup>/PI<sup>-</sup>), early apoptotic (FITC<sup>+</sup>/PI<sup>-</sup>), and late apoptotic or necrotic ones (FITC<sup>+</sup>/PI<sup>+</sup>); thus, the percentage of early apoptotic leukemic cells (early apoptosis index) was determined. Briefly, 1 μL of Annexin V-FITC (Immunotech) solution and 5 μL of PI (Immunotech) were added in the resuspended cell pellet and gently mixed, followed by addition of 20 μL of anti-CD19-PE (phycoerythrin; Immunotech) antibody. The tubes were incubated in the dark, on ice, for 15 minutes. Next, 400 μL of ice-cold binding buffer were added and the cell preparation was analyzed by two-color flow cytometry in a Coulter® Epics® XL-MCL™ Flow Cytometer (Beckman Coulter Inc.). At the FS/SS plot, the CD19<sup>+</sup> cell population (B cells) was further analyzed.

*Determination the IGHV mutational status.* Clonal PCR products were purified with the QIAquick Gel Extraction Kit (Qiagen Inc., Valencia, CA, USA) and both strands were sequenced, based on fluorescence dideoxy chain termination, in a CEQ™ 8000 Genetic Analysis System (Beckman Coulter Inc.). Sequencing data were analyzed using IMGT®, the International ImMunoGeneTics information system® (<http://imgt.cines.fr>) and, more particularly, the IMGT/V-QUEST and IMGT/JunctionAnalysis tools.

*RT-qPCR.* *SNORD48* was chosen as reference for the normalization of qPCR for the RNA quantity added to the reverse transcription. Moreover, cDNA prepared from RNA of U-937 cells was used as calibrator to render all data obtained by distinct qPCR runs comparable.

The sequence of the miR-155-5p forward primer was 5'-TTAATGCTAATCGTGATAGGGGTAA-3' and that of the *SNORD48* forward primer was 5'-TGATGATGACCCAGGTA ACTCT-3', while the sequence of the common reverse primer binding to the oligo-dT adapter was 5'-GCGAGCACAGAATTAATACGAC-3'. The PCR amplicons for miR-155-5p and *SNORD48* were 68 and 105 long, respectively.

The reaction mixture contained 1 µL of 10-fold diluted cDNA, 5 µL KAPA™ SYBR® FAST qPCR master mix (2X) (Kapa Biosystems Inc., Woburn, MA, USA), and 2 µL of primers (final concentration: 300 nM each), in a final reaction volume of 10 µL. The following cycling conditions were used: a denaturation step at 95 °C for 3 min, 40 cycles of 95 °C for 3 sec, for denaturation of the PCR products, and 60 °C for 30 sec, for primer annealing and extension as well as for detection of fluorescence. Melting curves of the PCR products were generated by heating the reaction from 60 °C to 95 °C with a rate of 0.3 °C/sec and continuously acquiring fluorescence emission data, so as to distinguish the specific PCR products from non-specific products, characterized by a different  $T_m$  than those of the miR-155-5p and *SNORD48* amplicons. All reactions were performed in duplicate.
